# Supplementary material
Source: ML conference proceedings conference paper supplement (https://openaccess.thecvf.com/content/CVPR2023/html/Sinha_Common_Pets_in_CVPR_2023_paper.html)
Supplement: Supplementary file 1 [file Sinha_Common_Pets_in_CVPR_2023_supplemental.pdf]

# Common Pets in 3D: Dynamic New-View Synthesis of Real-Life Deformable Categories

## Supplementary material

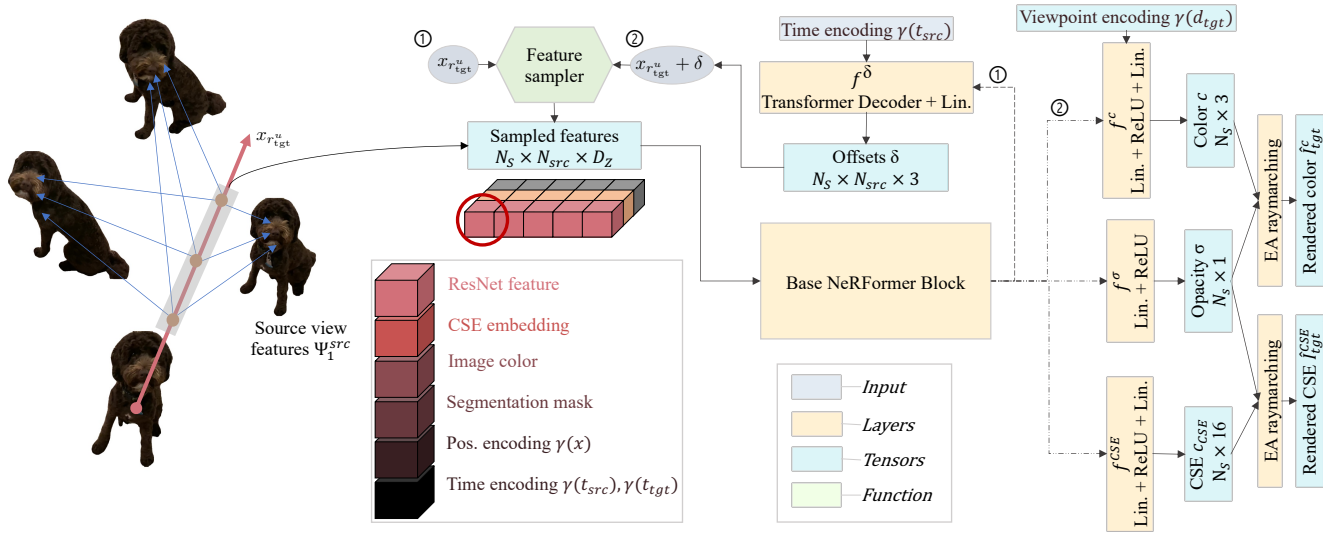

Figure I. **The architecture of Tracker-NeRF** First, source image features are bilinearly sampled given the points on the target ray  $\mathbf{r}_{tgt}^u$ . The sampled features are then processed with the Base NeRFormer Block (with the same architecture as in [38]) to generate intermediate features. The latter enters the offset prediction head  $\mathcal{D}_{TR}$  that generates per-point offsets  $\delta$  (① in the figure). The source images are then sampled again at the locations of projected offset-adjusted ray-points. The resampled features enter Base NeRFormer Block again to predict a new intermediate feature grid which enters 3 final heads that predict colour, opacity, and CSE embedding for each ray point (② in the figure). The final color and CSE render is formed by Emission-Absorption ray marching over the predicted opacities, colors, and CSE embeddings of the ray-points.

### A. Network architecture

The network architecture is summarized in Figure I. The sampled grid of TWCE encodings  $Z_{TWCE}^{\mathbf{r}_u}$ , or the adjusted tokens  $\tilde{Z}_{TWCE}^{\mathbf{r}_u}$ , are processed with Base NeRFormer Block which has the same architecture as the vanilla NeRFormer from [39]. The output of the NeRFormer block is a set of intermediate features that are converted to either: 1) scene flow  $\delta$  with the offset predictor  $\mathcal{D}_{TR}$  during the first pass or, 2) are converted to colors  $\mathbf{c}$ , opacities  $\sigma$ , or CSE embeddings  $\mathbf{C}$  with the final head  $f_{TR}^l$  during the second pass. The offset predictor  $\mathcal{D}_{TR}$  is implemented with a single-layer transformer decoder block that takes as input the intermediate features from the base NeRFormer block together with the encoding of the source time of each sampled point  $\gamma(t^{src})$ , and outputs the per-point offsets.

### B. Mask annotations for CoP3D

To generate the object masks  $M_i^j$ , we input each frame  $I_i^j$  to the PointRend semantic segmentation network [16],

extracting  $N_i^j$  candidate masks  $\hat{M}_i^j \in [0, 1]^{N_i^j \times H \times W}$ . To track a single foreground object across the video, we use a Hidden Markov Model to generate the set  $\{M_i^t | M_i^t \in [0, 1]^{H \times W}\}_{j=1}^{N_{V_i}}$  containing a single mask per frame, using intersection-over-union (IoU) of masks' bounding boxes as a pairwise potential.
